# Supplementary material for: Contribution of σ70 and σN Factors to Expression of Class II pilE in Neisseria meningitidis
Source: PubMed Central journal article supplement (PMC6755734; doi:10.1128/jb.00170-19), 2019-09-20
Supplement: JB.00170-19-s0002.pdf [file JB.00170-19-s0002.pdf]

**A**

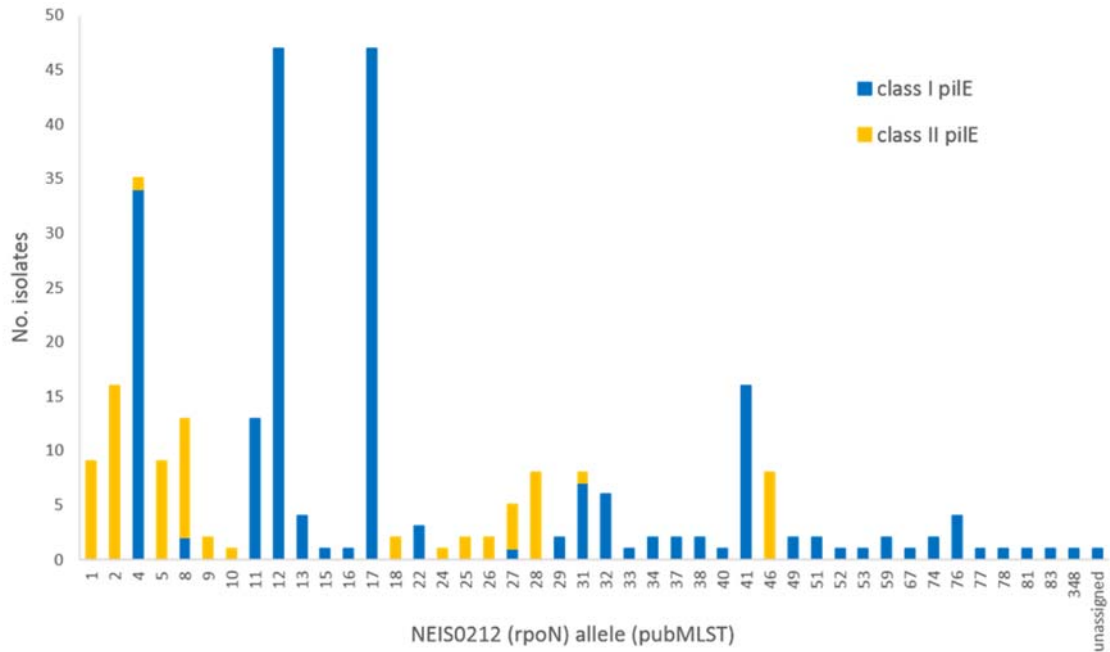

**Fig. S1. Prevalence of *rpoN* alleles in meningococcal genomes analysed in this study.**

A total of 290 meningococcal genomes were analysed. We identified 44 unique *rpoN* (NEIS0212) alleles among the 290 isolates. Isolates with class I *pilE* are indicated by blue bars, isolates with class II *pilE* locus are indicated by yellow bars. Of the 44 different alleles, 11 are exclusive to isolates with class II *pilE* and 29 are found only in isolates with class I *pilE*. Alleles 4, 8, 27 and 31 were found in isolates with class I *pilE* or class II *pilE*.

**SUPPLEMENTARY TABLES**

**Table S2: Bacterial strains used in this study**

| Strain                                                   | Genotype/Description                                                                                                                                                                                                   | Source     |
|----------------------------------------------------------|------------------------------------------------------------------------------------------------------------------------------------------------------------------------------------------------------------------------|------------|
| <b><i>E. coli</i></b>                                    |                                                                                                                                                                                                                        |            |
| Dh5α                                                     | F <sup>-</sup> <i>endA1 glnV44 thi-1 recA1 relA1 gyrA96 deoR nupG purB20</i><br>φ80d <i>lacZ</i> ΔM15 Δ( <i>lacZYA-argF</i> )U169, hsdR17( <i>r<sub>K</sub><sup>-</sup>m<sub>K</sub><sup>+</sup></i> ), λ <sup>-</sup> | Invitrogen |
| <b><i>N. meningitidis</i></b>                            |                                                                                                                                                                                                                        |            |
| S4                                                       | Serogroup C, ST-11 complex/ET-37, class II <i>pilE</i>                                                                                                                                                                 | (1)        |
| S4Δ <i>rpoN</i>                                          | <i>rpoN</i> replaced with kanamycin or erythromycin resistance marker                                                                                                                                                  | This study |
| S4Δ <i>rpoE</i>                                          | <i>rpoE</i> replaced with kanamycin resistance marker                                                                                                                                                                  | This study |
| S4φP <sub><i>pilE</i></sub> <i>lacZ</i>                  | Reporter strain for class II <i>pilE</i> promoter activity. S4 with <i>lacZ</i> in place of <i>pilE</i> ORF at native locus. Kanamycin resistant.                                                                      | This study |
| S4Δ <i>rpoN</i><br>φP <sub><i>pilE</i></sub> <i>lacZ</i> | Reporter strain for class II <i>pilE</i> promoter activity. S4Δ <i>rpoN</i> ( <i>erm(C)</i> ) with <i>lacZ</i> in place of <i>pilE</i> ORF at native locus. Kanamycin and erythromycin resistant.                      | This study |
| S4P <sub><i>lac</i></sub> - <i>rpoN</i> <sup>Nm</sup>    | S4 with gene encoding FLAG-tagged σ <sup>N</sup> from <i>N. meningitidis</i> strain S4 integrated at <i>trpB-iga</i> locus under control of IPTG inducible promoter. Erythromycin resistant.                           | This study |
| S4P <sub><i>lac</i></sub> - <i>rpoN</i> <sup>Nel</sup>   | S4 with gene encoding FLAG-tagged σ <sup>N</sup> from <i>N. elongata</i> strain 29315 integrated at <i>trpB-iga</i> locus under control of IPTG inducible promoter. Erythromycin resistant.                            | This study |
| S4 <i>ery</i>                                            | S4 with empty vector integrated at <i>trpB-iga</i> locus. Erythromycin resistant.                                                                                                                                      | This study |
| S4P <sub><i>lac</i></sub> - <i>rpoE</i>                  | S4 with gene encoding FLAG-tagged σ <sup>E</sup> integrated at <i>trpB-iga</i> locus under control of IPTG inducible promoter. Erythromycin resistant.                                                                 | This study |
| S4P <sub><i>lac</i></sub> - <i>rpoH</i>                  | S4 with gene encoding FLAG-tagged σ <sup>H</sup> integrated at <i>trpB-iga</i> locus under control of IPTG inducible promoter. Erythromycin resistant.                                                                 | This study |

1. **Uria MJ, Zhang Q, Li Y, Chan A, Exley RM, Gollan B, Chan H, Feavers I, Yarwood A, Abad R, Borrow R, Fleck RA, Mulloy B, Vazquez JA, Tang CM.** 2008. A generic mechanism in *Neisseria meningitidis* for enhanced resistance against bactericidal antibodies. *J Exp Med* **205**:1423-1434.

**Table S3: Primers used in this study**

| Name  | Description/Purpose                                                                                                                                              | SEQUENCE 5'-3'                                                   |
|-------|------------------------------------------------------------------------------------------------------------------------------------------------------------------|------------------------------------------------------------------|
| ML20  | Forward primer for upstream fragment for <i>rpoN</i> deletion in S4                                                                                              | <u>CACGAATTCTTTTCATTCAGCCACAAAT</u>                              |
| ML21  | Reverse primer for upstream fragment for <i>rpoN</i> deletion in S4                                                                                              | <u>CCAGGTACCGATAATGTGGGAGAAATTGT</u>                             |
| ML22  | Forward primer for kanamycin resistance marker for <i>rpoN</i> deletion in S4                                                                                    | <u>CCAGGTACCAATTGTGTCTCAAAATCTCTGA</u>                           |
| ML23  | Reverse primer for kanamycin resistance marker for <i>rpoN</i> deletion in S4                                                                                    | <u>CCAGGTACCCGATGCATGCCAACAGATAA</u>                             |
| ML24  | Forward primer for downstream fragment for <i>rpoN</i> deletion in S4                                                                                            | <u>CCAGGTACCTTGCTGAATAATCTTATAAAGAC</u>                          |
| ML25  | Reverse primer for downstream fragment for <i>rpoN</i> deletion in S4                                                                                            | <u>CCAGGATCCTTTTCGGTCATTTCTGATAAAC</u>                           |
| ML284 | Forward primer for upstream fragment for <i>rpoE</i> deletion in S4                                                                                              | <u>GATCCTCTAGAGTCGACCTGCAGGCATGCACTTTTAGACGGCATT</u><br>TGGCACTG |
| ML285 | Reverse primer for upstream fragment for <i>rpoE</i> deletion in S4                                                                                              | <u>CCCGTTGAATATGGCTCATAGTATCGGGAACAAGGTAAT</u>                   |
| ML288 | Forward primer for downstream fragment for <i>rpoE</i> deletion in S4                                                                                            | <u>GCTCGATGAGTTTTTCTAAAACACCGCACGGGTATTAC</u>                    |
| ML289 | Reverse primer for downstream fragment for <i>rpoE</i> deletion in S4                                                                                            | <u>CAGGAAACAGCTATGACCATGATTACGCCATGCTGCTTTTGAAGCG</u><br>TG      |
| ML286 | Forward primer for kanamycin fragment for <i>rpoE</i> deletion in S4                                                                                             | <u>AATTACCTTGTTCCCGATACTATGAGCCATATTCAACGGG</u>                  |
| ML287 | Reverse primer for kanamycin fragment for <i>rpoE</i> deletion in S4                                                                                             | <u>GTAATACCCGTGCGGTGTTTTAGAAAACTCATCGAGCATC</u>                  |
| ML46  | Reverse primer for upstream fragment for <i>rpoN</i> deletion in S4 $\phi$ <sub><i>pilE</i></sub> <i>lacZ</i> strains                                            | <u>GGATCCAAGGGCGATAATGTGGGAGAA</u>                               |
| ML52  | Forward primer for downstream fragment for <i>rpoN</i> deletion in S4 $\phi$ <sub><i>pilE</i></sub> <i>lacZ</i> strains                                          | <u>TCCCCGGGAAGGGCTCAGAATTGGTTAAT</u>                             |
| ML37  | Forward primer for upstream (5') fragment for replacement of class II <i>pilE</i> ORF with <i>lacZ</i> in S4 $\phi$ <sub><i>pilE</i></sub> <i>lacZ</i> strains   | <u>ATCCCACCAACCCACTTTTCCGC</u>                                   |
| ML34  | Reverse primer for upstream (5') fragment for replacement of class II <i>pilE</i> ORF with <i>lacZ</i> in S4 $\phi$ <sub><i>pilE</i></sub> <i>lacZ</i> strains   | <u>TGAATCCGTAATCATGGTCATTTGGATGACTCCTG</u>                       |
| ML31  | Forward primer for downstream (3') fragment for replacement of class II <i>pilE</i> ORF with <i>lacZ</i> in S4 $\phi$ <sub><i>pilE</i></sub> <i>lacZ</i> strains | <u>TGGTGTCAAAAATAACACCAAATAAGGACA</u>                            |

|       |                                                                                                                                                                 |                                                                                                                          |
|-------|-----------------------------------------------------------------------------------------------------------------------------------------------------------------|--------------------------------------------------------------------------------------------------------------------------|
| ML30  | Reverse primer for downstream (3') fragment for replacement of class II <i>pilE</i> ORF with <i>lacZ</i> in $S4\phi P_{pilE}/lacZ$ strains                      | TCACGATAGGCGAGGCGCA                                                                                                      |
| ML33  | Forward primer amplification of <i>lacZ</i> from pRS415 fragment for replacement of class II <i>pilE</i> ORF with <i>lacZ</i> in $S4\phi P_{pilE}/lacZ$ strains | CAGGAGTCATCCAAATGACCATGATTACGGATTCA                                                                                      |
| ML32  | Reverse primer amplification of <i>lacZ</i> from pRS415 fragment for replacement of class II <i>pilE</i> ORF with <i>lacZ</i> in $S4\phi P_{pilE}/lacZ$ strains | TGTCCTTATTGGTGTATTTTTGACACCA                                                                                             |
| ML151 | Forward primer for amplification of 3' end of <i>iga</i> gene for pNMC2 construction                                                                            | <u>GAGATTTTCGATTCCACCGCCGCTTATGCAGTCAGCACCAATAC</u>                                                                      |
| ML149 | Reverse primer for amplification of 3' end of <i>iga</i> gene for pNMC2 construction                                                                            | <u>GAACATGATGAGTGATCGTTAAATTTGTTAATCCACTATAAAAAT</u><br>GCC                                                              |
| ML148 | Forward primer for amplification of <i>erm(C)</i> and <i>lac</i> regulatory region from pGCC4, for pNMC2 construction                                           | TTATTTTGCTATGAGGGATCCGCTAGCACTAG                                                                                         |
| ML150 | Reverse primer for amplification of <i>erm(C)</i> and <i>lac</i> regulatory region from pGCC4, for pNMC2 construction                                           | AACA <u>AAATTTAACGATCACTCATCATGTTC</u>                                                                                   |
| ML152 | Forward primer for amplification of plasmid backbone from pNCC1, for pNMC2 construction                                                                         | <u>AAGGCGGCGGTGGAATCG</u>                                                                                                |
| ML146 | Forward primer for amplification of 3' end of <i>trpB</i> gene for pNMC2 construction                                                                           | <u>CGCGGAATTCTCATGTTTGACAGCTTATAAGCGGAAGACTTGAAC</u><br>CAC                                                              |
| ML147 | Reverse primer for amplification of 3' end of <i>trpB</i> gene for pNMC2 construction                                                                           | <u>CTAGTGCTAGCGGATCCCTCATAGCAAAATAAAATGCCGT</u>                                                                          |
| ML153 | Reverse primer for amplification of plasmid backbone from pNCC1, for pNMC2 construction                                                                         | <u>ATAAGCTGTCAAACATGAGAATTCCGC</u>                                                                                       |
| ML154 | Forward primer for amplification of <i>rpoN</i> from <i>S4</i> . For cloning into pNMC2                                                                         | <u>CCCAAGCTTGAGTAATTTTATGACCTTACTCGGAATAAAGCT</u>                                                                        |
| ML155 | Reverse primer for amplification of <i>rpoN</i> from <i>S4</i> . For cloning into pNMC2. Primer includes sequence for in frame triple FLAG TAG                  | <u>GTGGTTTAAACTCACTTGTCGTCGTCGTCCTTGTAGTCGATGTCGT</u><br><u>GGTCCTTGTAGTCACCGTCGTCGTCCTTGTAGTCTTCTGCGGTTTT</u><br>GCGTTT |
| ML173 | Forward primer for amplification of <i>rpoN</i> from <i>N. elongata</i> . For pNMC2 <i>rpoN<sup>Nel</sup></i> construction                                      | <u>TTACGAATCCCGGATTAATTAAGCTTGGAGTAATTTTATGACA</u><br>TTGCTCGGATTAAACT                                                   |

|       |                                                                                                                                        |                                                                                                                        |
|-------|----------------------------------------------------------------------------------------------------------------------------------------|------------------------------------------------------------------------------------------------------------------------|
| ML175 | Reverse primer for amplification of <i>rpoN</i> from <i>N. elongata</i> . For pNMC2 <i>rpoN</i> <sup>NeI</sup> construction            | <u>CTTGTAGTCACCGTCGTGGTCTTGTAGTCGATCCTGCGTTGGTGT</u><br>GC                                                             |
| ML172 | Forward primer for amplification of pNMC2 fragment for pNMC2 <i>rpoN</i> <sup>NeI</sup> construction.                                  | <u>GACTACAAGGACCACGACGGTGAC</u>                                                                                        |
| ML174 | Reverse primer for amplification of pNMC2 fragment for pNMC2 <i>rpoN</i> <sup>NeI</sup> construction.                                  | <u>AAGCTTTTAATTAATCCGGGAA</u>                                                                                          |
| ML280 | Forward primer for amplification of <i>rpoE</i> from S4. For cloning into pNMC2                                                        | <u>CCATGATTACGAATCCCGGATTAATTAAGGAGTAATTTATGCC</u><br>GCTACCCGACCT                                                     |
| ML282 | Reverse primer for amplification of <i>rpoE</i> from S4. For cloning into pNMC2. Primer includes sequence for in frame triple FLAG TAG | <u>TCACTTGTCGTCGTCGTCCTTGTAGTCGATGTCGTGGTCTTGTAGT</u><br><u>CACCGTCGTGGTCTTGTAGTCCTTCGGGTTTTCTTGGTTGAAC</u>            |
| ML184 | Forward primer for amplification of <i>rpoH</i> from S4. For cloning into pNMC2                                                        | <u>ACCATGATTACGAATCCCGGATTAATTAAGGAGTAATTTATGA</u><br>ATAACGCTTTCGC                                                    |
| ML188 | Reverse primer for amplification of <i>rpoH</i> from S4. Primer includes sequence for in frame triple FLAG TAG                         | <u>TCGTTAAATTTTCACTTGTGTCGTCGTCCTTGTAGTCGATGTCGTG</u><br><u>GTCCTTGTAGTCACCGTCGTGGTCTTGTAGTCAACCGCTTCGGCT</u><br>TCTTC |
| ML66  | cDNA synthesis for <i>rpoN</i>                                                                                                         | <u>CCGTCTAGCTCTCTAATCGATGCTGTCGAGGGCGTTTCG</u>                                                                         |
| ML67  | Strand-specific RT-PCR for <i>rpoN</i>                                                                                                 | CAAGCCCTGACTGCATTGC                                                                                                    |
| ML69  | cDNA synthesis for <i>pilE</i>                                                                                                         | <u>CCGTCTAGCTCTCTAATCGCCTTCAACCTTAACCGATGC</u>                                                                         |
| ML70  | Strand-specific RT-PCR for <i>pilE</i>                                                                                                 | AAGGTCAAAAATCCGCAGTG                                                                                                   |
| ML71  | cDNA synthesis for tmRNA                                                                                                               | <u>CCGTCTAGCTCTCTAATCGAACCCGGTAGGAAACCGATC</u>                                                                         |
| ML72  | Strand-specific RT-PCR for tmRNA                                                                                                       | AGTCGCAAACGACGAACTT                                                                                                    |
| ML68  | Strand-specific RT-PCR tag primer                                                                                                      | <u>CCGTCTAGCTCTCTAATCG</u>                                                                                             |
| P1    | Primer extension to identify class II <i>pilE</i> TSS                                                                                  | CCTTCTTACCAGCAAGCGGC                                                                                                   |
| P2    | Primer extension to identify class II <i>pilE</i> TSS                                                                                  | CGTAATGTATTTGACCGTGG                                                                                                   |

Underlined overlap sequences that are not present in genomic sequence added for Gibson cloning. FLAG tag is double underlined.
